# Supplementary material for: New Emerging Targets in Cancer Immunotherapy: The Role of B7-H3
Source: MDPI journal article supplement (doi:10.3390/vaccines12010054), 2024-01-05
Supplement: s1 [file s1]

Supplementary Table S1. Expression patterns of B7-H3 in solid malignancies.

| Malignancy                | B7-H3 expression |       |                           |        | Tumor cell expression    | Cellular localization |                                           |               | Stromal expression       | Reference |
|---------------------------|------------------|-------|---------------------------|--------|--------------------------|-----------------------|-------------------------------------------|---------------|--------------------------|-----------|
|                           | Total            | Weak  | Moderate                  | Strong |                          | Nucleus               | Cytoplasm                                 | Cell membrane |                          |           |
| Hepatocellular carcinoma  | 93.8%            | 23.8% | 37.1%                     | 32.9%  |                          | N/A                   | N/A                                       | N/A           | 86.2 %                   | [71]      |
|                           | 88.6%            | 9.6%  | 51.6%                     | 38.7%  | N/A                      | N/A                   | N/A                                       | N/A           | N/A                      | [72]      |
|                           | 90.5%            | 58.7% | N/A                       | 41.3%  | N/A                      | N/A                   | N/A                                       | N/A           | N/A                      | [73]      |
| Pancreatic adenocarcinoma | 66%              | 68%   | 19.7%                     | 12.3%  | N/A                      | N/A                   | N/A                                       | N/A           | N/A                      | [74]      |
|                           | 63%              | 73%   | 27%                       | 0%     | 21%                      | N/A                   | N/A                                       | N/A           | 63%                      | [28]      |
|                           | 88%              | N/A   | N/A                       | N/A    | N/A                      | N/A                   | N/A                                       | N/A           | N/A                      | [75]      |
|                           | 93.2%            | 29%   | N/A                       | 71%    | 93.2%                    | N/A                   | N/A                                       | N/A           | N/A                      | [76]      |
| Gastric adenocarcinoma    | 76%              | 44%   | moderate or strong in 56% |        | 18%                      | N/A                   | N/A                                       | N/A           | 82%                      | [29]      |
|                           | 58.8%            | N/A   | N/A                       | N/A    | N/A                      | N/A                   | N/A                                       | N/A           | N/A                      | [77]      |
|                           | 78%              | N/A   | N/A                       | N/A    | N/A                      | N/A                   | N/A                                       | N/A           | N/A                      | [78]      |
|                           | 85%              | 20%   | 65.7%                     | 14.3%  | High expression in 18.7% | N/A                   | N/A                                       | N/A           | High expression in 62.7% | [79]      |
| Colorectal carcinoma      | 81.6%            | 47.9% | 23.9%                     | 28.1%  | N/A                      | N/A                   | N/A                                       | N/A           | N/A                      | [80]      |
|                           | 87%              | 12.6% | 19.8%                     | 67.6%  | N/A                      | 27%                   | Cytoplasmic or membrane expression in 86% |               | 77%                      | [26]      |
| Cervical cancer           | 94%              | 62.8% | N/A                       | N/A    | N/A                      | N/A                   | N/A                                       | N/A           | 94%                      | [30]      |

|                                     |        |             |        |        |        |                                          |       |       |           |      |
|-------------------------------------|--------|-------------|--------|--------|--------|------------------------------------------|-------|-------|-----------|------|
|                                     | 72.2%  | N/A         | N/A    | 36.7%  | N/A    | N/A                                      | N/A   | N/A   | N/A       | [81] |
| <b>Endometrial serous carcinoma</b> | 93%    | N/A         | N/A    | N/A    | N/A    | N/A                                      | N/A   | N/A   | N/A       | [82] |
|                                     | 77.7%  | 77.7%       | N/A    | N/A    | N/A    | N/A                                      | N/A   | N/A   | 60.6%     | [83] |
| <b>Ovarian cancer</b>               | 93%    | 93%         | N/A    | N/A    | N/A    | N/A                                      | N/A   | N/A   | Scattered | [84] |
| <b>SCLC</b>                         | 64.9%  | N/A         | N/A    | N/A    | N/A    | Predominantly cytoplasmic and membranous |       |       | N/A       | [85] |
|                                     | 64.49% | N/A         | N/A    | N/A    | N/A    | N/A                                      | N/A   | N/A   | N/A       | [86] |
| <b>NSCLC</b>                        | 69.5%  | N/A         | N/A    | N/A    | N/A    | N/A                                      | N/A   | N/A   | N/A       | [87] |
|                                     | 80.4%  | Predominant | N/A    | N/A    | N/A    | Predominantly cytoplasmic and membranous |       |       | Scattered | [88] |
|                                     | 90%    | N/A         | 35.45% | 30.91% | 23.64% | Predominantly cytoplasmic and membranous |       |       | N/A       | [89] |
| <b>Breast cancer</b>                | 56.8%  | N/A         | N/A    | N/A    | N/A    | Predominantly cytoplasmic and membranous |       |       | N/A       | [90] |
|                                     | 90.6%  | N/A         | N/A    | N/A    | N/A    | N/A                                      | N/A   | N/A   | N/A       | [91] |
| RCC                                 | 95.1%  | 17.4%       | N/A    | N/A    | N/A    | N/A                                      | N/A   | N/A   | 95.1%     | [92] |
|                                     | 96.9%  | 96.9%       | N/A    | N/A    | N/A    | 4%                                       | 79.1% | 96.9% | N/A       | [27] |
| Prostate cancer                     | 47%    | N/A         | 25.5%  | 44.9%  | 28.7%  | Predominantly membranous                 |       |       | N/A       | [93] |
| <b>Neuroblastoma</b>                | 82%    | 30.6%       | 35.3%  | 34.1%  | N/A    | N/A                                      | N/A   | N/A   | N/A       | [94] |
|                                     | 94.4%  | 17.6%       | 52.9%  | 29.4%  | N/A    | N/A                                      | N/A   | N/A   | N/A       | [95] |
| <b>Melanoma</b>                     | N/A    | N/A         | N/A    | N/A    | N/A    | N/A                                      | N/A   | N/A   | N/A       | N/A  |

Abbreviations: N/A: not available/not reported.
